# Supplementary material for: Effect of Heat Stress on Egg Production, Steroid Hormone Synthesis, and Related Gene Expression in Chicken Preovulatory Follicular Granulosa Cells
Source: MDPI journal article supplement (doi:10.3390/ani12111467), 2022-06-05
Supplement: s1 [file s1]

**Table S1. Ingredients and nutrient composition of the experimental basal diet (as fed basis) fed to laying hens**

| <b>Ingredients</b>              | <b>Content (%)</b> | <b>Calculated or analyzed composition</b> |       |
|---------------------------------|--------------------|-------------------------------------------|-------|
| Corn                            | 57                 | ME (MJ/kg) <sup>2</sup>                   | 11.2  |
| Soybean meal, 43% crude protein | 22                 | crude protein                             | 17.50 |
| Corn gluten meal                | 5                  | Ether extract                             | 6.32  |
| Rice bran                       | 3                  | Lysine                                    | 0.78  |
| Limestone                       | 8                  | Methionine                                | 0.54  |
| Premix <sup>1</sup>             | 3                  | Calcium                                   | 3.52  |
| NaCl                            | 0.4                | Total phosphorus                          | 0.48  |
| Calcium hydrophosphate          | 1.6                | Available phosphorus                      | 0.29  |
| Total                           | 100.00             |                                           |       |

<sup>1</sup> The premix provides the following per kg diet: vitamin A, 7000 IU; vitamin D3, 2500 IU; vitamin E, 36 mg; vitamin K, 32 mg; vitamin B12, 0.025 mg; vitamin B2, 5.6 mg; vitamin B6, 4 mg; vitamin B12, 0.025 mg; nicotinic acid, 38 mg; folic acid, 1.1 mg; calcium pantothenate, 10 mg; biotin, 0.16 mg; Cu, 10 mg; Fe, 80 mg; Mn, 100 mg; Zn, 60 mg; I, 0.55 mg; and Se, 0.12 mg.<sup>2</sup> ME, metabolic energy, calculated values.

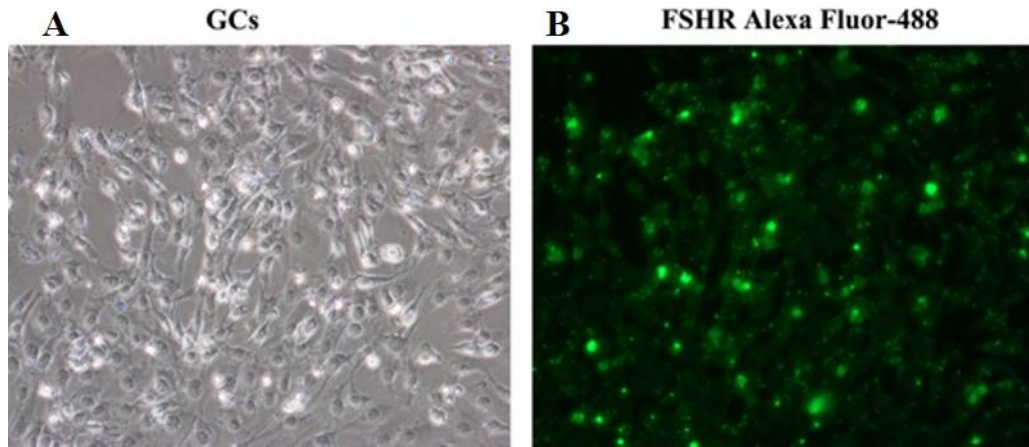

Supplementary Figure S1. Characterization of cultured follicular granulosa cells from laying hens and FSHR fluorescence immunostaining. A: The granulosa cells cultured for 48 h of post isolation. B: Immunoblotting for anti-FSHR cytoplasm (green).
